# Supplementary material for: The Effects of Competition on Exercise Intensity and the User Experience of Exercise, during Virtual Reality Bicycling for Healthy Adults Across the Lifespan
Source: Research Square preprint supplement (doi:10.21203/rs.3.rs-6531076/v1), 2025-05-12
Supplement: Supplementary file 1 [file 064e60d827ce1c6042172905.docx]

Supplemental Tables

| **Table S1 – Exercise Intensity for Older Adults (RMANOVA)** | | | |
| --- | --- | --- | --- |
| **Outcome** | **RMANOVA** | **Effect Size**  η2partial | **Post-Hocs** |
| Heart Rate | F(2, 42) = 18.9  **p < 0.001** | 0.474 | Self > Feedback, p < 0.001  Other > Feedback, p < 0.001 |
| Raw Cadence | F(1, 33) = 19.6  **p < 0.001** | 0.460 | Self > Feedback, p < 0.001  Other > Feedback, p < 0.001 |
| Normalized Cadence | F(1, 32) = 18.6  **p < 0.001** | 0.447 | Self > Feedback, p < 0.001  Other > Feedback, p < 0.001 |

**Table S1 – Exercise Intensity for Older Adults (Repeated Measures ANOVA)**: Data pertaining to exercise intensity are shown for older adults. The effect sizes are shown for the RMANOVA, and p-values are provided for the omnibus test and for post-hoc tests if the RMANOVA was statistically significant.

**Table S2 – Exercise Intensity for Older Adults (Post-Hoc Tests)**

|  | **Feedback & Competition Other** | **Feedback &**  **Self-Competition** | **Competition Other &**  **Self-Competition** |
| --- | --- | --- | --- |
| Heart Rate (% Max) | t(24) = -4.15  p < 0.001 | t(24) = -6.16  p < 0.001 | t(24) = 1.19  p > 0.0167 |
| Raw Cadence (RPM) | t(24)= -4.69  p < 0.001 | t(24)= -4.76  p < 0.001 | t(23) = 2.00  p >0.0167 |

**Table S2:** **Post-Hoc Tests for Exercise Intensity.** Results of the post-hoc tests between conditions for all 3 comparisons are shown for the measures of exercise intensity (Aim 1). T-values are included for comparisons for which the assumption of normality was upheld (paired t-tests) and Wilcoxon signed rank-test scores (W) are shown for comparisons that are not normally distributed.

| **Table S3 – User Experience of Exercise for Older Adults (RMANOVA)** | | | |
| --- | --- | --- | --- |
| **Outcome** | **RMANOVA** | **Effect Size**  η2partial | **Post-Hocs** |
| Endpoint RPE | F(2, 46) = 23.9  **p < 0.001** | 0.510 | Self > Feedback, p < 0.001  Other > Feedback, p < 0.001 |
| Change in RPE | F(2, 46) = 22.1  **p < 0.001** | 0.490 | Self > Feedback, p < 0.001  Other > Feedback, p < 0.001 |
| IMI  Enjoyment | F(1, 34) = 0.9  p > 0.05 | 0.039 | Not performed |
| IMI  Effort | F(1, 33) = 2.5  p > 0.05 | 0.099 | Not performed |
| IMI  Total | F(2, 35) = 0.4  p > 0.05 | 0.019 | Not performed |

**Table S3 – User Experience for Older Adults (Repeated Measures ANOVA)**: Data pertaining to the user experience of exercise are shown for older adults. The effect sizes are shown for the RMANOVA, and p-values are provided for the omnibus test and for post-hoc tests if the RMANOVA was statistically significant.

**Table S4:** **Post-Hoc Tests for User Experience of Exercise in Older Adults**

|  | **Feedback & Competition Other** | **Feedback &**  **Self-Competition** | **Competition Other &**  **Self-Competition** |
| --- | --- | --- | --- |
| Endpoint RPE | W = 187  p < 0.001 | W=220  p < 0.001 | t(23) = 0.485  p > 0.0167 |
| Change in RPE | t(23)= -5.19  p < 0.001 | t(24)= 5.71  p < 0.001 | t(23) = 0.720  p >0.0167 |
| IMI Enjoyment | Not performed | Not performed | Not performed |
| IMI Effort | Not performed | Not performed | Not performed |
| IMI Total | Not performed | Not performed | Not performed |

**Table S4:** **Post-Hoc Tests for User Experience of Exercise.** Results of the post-hoc tests between conditions for all 3 comparisons are shown for the measures of user experience of exercise (Aim 2). T-values are included for comparisons for which the assumption of normality was upheld (paired t-tests) and Wilcoxon signed rank-test scores (W) are shown for comparisons that are not normally distributed.

| **Table S5 – Visual Attention for Older Adults (RMANOVA)** | | | |
| --- | --- | --- | --- |
| **Outcome** | **RMANOVA** | **Effect Size**  η2partial | **Post-Hocs** |
| Task Focus | F(1, 25) = 0.2  p > 0.05 | 0.007 | Not performed |
| Roadside  Gazes | F(1, 23) = 2.5  p > 0.05 | 0.107 | Not performed |
| Rightward Gazes | F(1, 25) = 1.1  p > 0.05 | 0.050 | Not performed |
| Water  Gazes | F(2, 42) = 3.1  p > 0.05 | 0.127 | Not performed |

**Table S5 – Visual Attention for Older Adults (Repeated Measures ANOVA)**: Data pertaining to visual attention are shown for older adults. The effect sizes are shown for the RMANOVA, and p-values are provided for the omnibus test and for post-hoc tests if the RMANOVA test was statistically significant.
